# Supplementary material
Source: PubMed Central journal article supplement (PMC7720644)
Supplement: nutrition182592supplementarydata1.pdf [file nutrition182592supplementarydata1.pdf]

**Supplemental Table 1:** Factor loadings of adapted Brief Acculturation Rating Scale for Mexican Americans-II acculturation instrument in Puerto Rican participants<sup>1</sup>

| Item                                            | Factor 1 | Factor 2 |
|-------------------------------------------------|----------|----------|
| 1. I speak Spanish                              |          | 0.82     |
| 2. I speak English                              | 0.92     |          |
| 3. I enjoy speaking Spanish                     |          | 0.80     |
| 4. I enjoy English language movies              | 0.75     |          |
| 5. I enjoy Spanish language TV                  |          | 0.64     |
| 6. I enjoy Spanish language movies              | -0.73    |          |
| 7. I enjoy reading books in Spanish             | -0.61    |          |
| 8. I write letters in English                   | 0.89     |          |
| 9. My thinking is done in the English language  | 0.88     |          |
| 10. My thinking is done in the Spanish language |          | 0.78     |

<sup>1</sup> Note: Items were based on the original Brief Acculturation Rating Scale for Mexican Americans-II instrument. The items “I associate with Anglos” and “My friends are Anglo American” were excluded from the factor analysis due to lack of responses from surveyed mothers.
